# Supplementary material for: Experiences With Insurance Plans and Providers Among Persons With Mental Illness
Source: Atypon-hosted journal article supplement (doi:10.1176/appi.ps.201400514), 2015-11-16
Supplement: appi.ps.201400514.ds001.pdf [file appi.ps.201400514.ds001.pdf]

**Mental Illness and Experiences with Insurance Plans and Providers****Appendix Table 1: Results of Multivariate Logistic Regression of Provider Problems, 2004-2012**

|                                                 | Doesn't ask<br>about other<br>treatments<br>N=20,674 |     | Doesn't<br>explain<br>options<br>N=20,775 |     | Doesn't respect<br>treatment<br>choice<br>N=18,986 |     | Doesn't seek<br>decision<br>participation<br>N=19,969 |     |
|-------------------------------------------------|------------------------------------------------------|-----|-------------------------------------------|-----|----------------------------------------------------|-----|-------------------------------------------------------|-----|
|                                                 | OR                                                   | SE  | OR                                        | SE  | OR                                                 | SE  | OR                                                    | SE  |
| <b>Mental Health</b> (ref: no MI)               |                                                      |     |                                           |     |                                                    |     |                                                       |     |
| <b>Episodic MI</b>                              | 1.14*                                                | .07 | 1.41**                                    | .17 | 1.17                                               | .11 | 1.15                                                  | .09 |
| <b>Persistent MI</b>                            | 1.02                                                 | .09 | 1.66***                                   | .22 | 1.35*                                              | .16 | 1.32**                                                | .12 |
| <b>Age</b>                                      | 1.01*                                                | .0  | 1.0                                       | .0  | 1.01*                                              | .0  | 1.0                                                   | .0  |
| <b>Female</b>                                   | 1.02                                                 | .05 | .92                                       | .07 | .9                                                 | .06 | .92                                                   | .04 |
| <b>Married</b> (ref: single/div/widow)          | .87*                                                 | .06 | .89                                       | .09 | .85*                                               | .07 | .85*                                                  | .06 |
| <b>Race/ethnicity</b> (ref: White non-Hispanic) |                                                      |     |                                           |     |                                                    |     |                                                       |     |
| Black non-Hispanic                              | .94                                                  | .08 | .94                                       | .12 | 1.03                                               | .09 | 1.32***                                               | .09 |
| Hispanic                                        | .98                                                  | .08 | 1.26                                      | .17 | .96                                                | .09 | 1.20*                                                 | .11 |
| Other                                           | 1.29*                                                | .14 | 1.60**                                    | .28 | 1.57***                                            | .21 | 1.43***                                               | .14 |
| <b>Education</b> (ref: < HS)                    |                                                      |     |                                           |     |                                                    |     |                                                       |     |
| High school grad                                | .94                                                  | .08 | .91                                       | .12 | .91                                                | .11 | .97                                                   | .09 |
| Any college                                     | .86                                                  | .08 | .88                                       | .11 | .99                                                | .12 | .89                                                   | .08 |
| <b>Poverty</b> (ref: < 100% FPL)                |                                                      |     |                                           |     |                                                    |     |                                                       |     |
| 100% to <125%                                   | .79                                                  | .12 | .56*                                      | .14 | .84                                                | .16 | 1.02                                                  | .14 |
| 125% to < 200%                                  | .87                                                  | .11 | .66*                                      | .13 | .81                                                | .09 | .94                                                   | .1  |
| 200% to <400%                                   | .93                                                  | .13 | .69                                       | .16 | .86                                                | .1  | .84                                                   | .09 |
| >=400%                                          | .87                                                  | .12 | .85                                       | .21 | .83                                                | .1  | .89                                                   | .1  |
| <b>Urban</b>                                    | .94                                                  | .1  | 1.11                                      | .21 | 1.41**                                             | .17 | .99                                                   | .09 |
| <b>Employed</b>                                 | 1.09                                                 | .09 | 1.23                                      | .14 | 1                                                  | .1  | 1.11                                                  | .08 |
| <b>Chronic cond.</b> (no.)                      | .98                                                  | .03 | 1.04                                      | .04 | 1.02                                               | .03 | .98                                                   | .03 |
| <b>Functional Limitation</b>                    | 1.17                                                 | .1  | 1.26                                      | .16 | 1.14                                               | .15 | 1.31**                                                | .13 |
| <b>Activity limitation</b>                      | .92                                                  | .18 | 1.01                                      | .27 | 1.38                                               | .28 | .92                                                   | .18 |
| <b>Poor self-rated health</b>                   | .89                                                  | .09 | 1.26*                                     | .14 | .96                                                | .1  | 1.1                                                   | .09 |
| <b>Change in insurance</b>                      | .94                                                  | .08 | .9                                        | .1  | 1.14                                               | .12 | 1.03                                                  | .08 |
| <b>Private</b> (ref: public)                    | 1.0                                                  | .0  | 1.0                                       | .0  | 1.0                                                | .0  | 1.0                                                   | .0  |
| <b>OOP on health (\$)</b>                       | .84                                                  | .08 | .9                                        | .14 | .84                                                | .09 | .88                                                   | .08 |
| <b>Person as Usual Source of Care</b>           | 1.11                                                 | .06 | .81                                       | .09 | .73***                                             | .06 | .84**                                                 | .05 |
| <b>Health Care Use</b>                          |                                                      |     |                                           |     |                                                    |     |                                                       |     |
| Prescription drug events                        | .99*                                                 | .0  | .99                                       | .00 | 1.00                                               | .00 | 1.00                                                  | .00 |
| Office-based visits                             | .99                                                  | .01 | 1.00                                      | .01 | 1.00                                               | .00 | 1.01                                                  | .00 |
| Out-patient visits                              | 1.0                                                  | .01 | .97                                       | .02 | .95                                                | .03 | .99                                                   | .01 |
| Inpatient visits                                | 1.06                                                 | .07 | 1.06                                      | .08 | 1.02                                               | .08 | .98                                                   | .06 |
| Emergency room visits                           | .83                                                  | .09 | .79                                       | .15 | 1.00                                               | .11 | .97                                                   | .11 |
| <b>Post ACA</b>                                 | .91                                                  | .06 | 1.05                                      | .12 | .83*                                               | .06 | .85*                                                  | .06 |

SE = standard error. \*\*\* $p < .001$ , \*\* $p < .01$ , \* $p < .05$ , compared to persons with no problem. MI= mental illness. Episodic MI = SPD or depression at one assessment; Persistent MI = SPD or depression at two assessments. FPL = Federal Poverty Line. Episodic = Serious psychological distress (SPD) or depression at 1 assessment; Persistent = SPD or depression at both assessments. Poor self-rated health= fair or poor compared to good/very good/excellent. Functional limitations = problems with walking, climbing stairs, grasping objects, reaching overhead, lifting, bending or stooping, or standing for long periods of time. Activity limitation = dressing/bathing, eating, walking, toileting, hygiene. Chronic conditions include: diabetes mellitus, hypertension, coronary heart disease, myocardial infarction, cerebrovascular disease, asthma, emphysema, and arthritis. OOP = out-of-pocket expenditure on health care. OOP = out-of-pocket expenditure on health care. USC = usual source of care. Post ACA = assessed in 2010 or later.

**Appendix Table 2: Results of Multivariate Logistic Regression of Insurance Plan Problems, 2004-2012**

|                                                     | Finding a<br>Doctor<br>N=22,203 |      | Finding<br>Information<br>N=8,146 |      | Treatment<br>Approval<br>N=7,232 |      | Paperwork<br>N=7,786 |      | Customer<br>Service<br>N=8,778 |      |
|-----------------------------------------------------|---------------------------------|------|-----------------------------------|------|----------------------------------|------|----------------------|------|--------------------------------|------|
|                                                     | OR                              | SE   | OR                                | SE   | OR                               | SE   | OR                   | SE   | OR                             | SE   |
| <b>Mental Health</b> (ref: no MI)                   |                                 |      |                                   |      |                                  |      |                      |      |                                |      |
| <b>Transient MI</b>                                 | 1.31**                          | .10  | 1.21                              | .11  | 1.12                             | .11  | 1.13                 | .13  | 1.23                           | .11  |
| <b>Persistent MI</b>                                | 1.61**                          | .16  | 1.66*                             | .23  | 1.72**                           | .23  | 1.79**               | .25  | 1.64**                         | .21  |
| <b>Age</b>                                          | .99*                            | .00  | .99*                              | .00  | .99                              | .00  | .99                  | .00  | .99                            | .00  |
| <b>Female</b>                                       | 1.10                            | .07  | .96                               | .07  | 1.05                             | .09  | 1.09                 | .09  | 1.00                           | .07  |
| <b>Married</b> (ref:<br>single/div/widow)           | .96                             | .08  | 1.15                              | .11  | 1.00                             | .12  | 1.06                 | .11  | 1.07                           | .11  |
| <b>Race/ethnicity</b> (ref: White non-<br>Hispanic) |                                 |      |                                   |      |                                  |      |                      |      |                                |      |
| Black non-Hispanic                                  | .76**                           | .08  | .67*                              | .12  | .94                              | .16  | .82                  | .16  | .81                            | .13  |
| Hispanic                                            | 1.05                            | .11  | 1.17                              | .17  | 1.18                             | .17  | 1.19                 | .17  | 1.10                           | .15  |
| Other                                               | 1.43**                          | .17  | 1.14                              | .19  | 1.39                             | .25  | 1.44*                | .24  | 1.29                           | .20  |
| <b>Education</b> (ref: < HS)                        |                                 |      |                                   |      |                                  |      |                      |      |                                |      |
| High school grad                                    | 1.0                             | 0.12 | 0.89                              | 0.19 | 1.02                             | .19  | .90                  | .16  | 0.73*                          | .10  |
| Any college                                         | 1.27                            | 0.16 | 1.14                              | 0.23 | 1.27                             | 0.26 | 1.13                 | 0.22 | 0.87                           | 0.13 |
| <b>Poverty</b> (ref: < 100% FPL)                    |                                 |      |                                   |      |                                  |      |                      |      |                                |      |
| 100% to <125%                                       | .99                             | .17  | .91                               | .30  | .80                              | .25  | 1.15                 | .35  | 1.07                           | .27  |
| 125% to < 200%                                      | .89                             | .12  | 1.12                              | .34  | 1.33                             | .35  | 1.61                 | .41  | 1.25                           | .30  |
| 200% to <400%                                       | .67**                           | .09  | .73                               | .19  | .84                              | .22  | .98                  | .24  | .82                            | .19  |
| >=400%                                              | .64**                           | .09  | .74                               | .18  | .79                              | .20  | 1.06                 | .25  | .86                            | .18  |
| <b>Urban</b>                                        | 1.11                            | .15  | .93                               | .16  | .80                              | .13  | .85                  | .14  | .93                            | .14  |
| <b>Employed</b>                                     | 1.29**                          | .12  | 1.12                              | .12  | 1.13                             | .13  | 1.18                 | .15  | 1.04                           | .10  |
| <b>Chronic cond. (no.)</b>                          | 1.09**                          | .04  | 1.10*                             | .05  | 1.06                             | .05  | 1.11*                | .05  | 1.05                           | .04  |
| <b>Functional Limitation</b>                        | 1.25                            | .15  | 1.35                              | .23  | 1.24                             | .23  | 1.38                 | .25  | 1.17                           | .19  |
| <b>Activity limitation</b>                          | 1.09                            | .21  | .97                               | .36  | 2.15*                            | .65  | 1.88*                | .60  | .99                            | .30  |
| <b>Poor self-rated health</b>                       | 1.17                            | .12  | 1.15                              | .17  | 1.10                             | .17  | 1.07                 | .16  | 1.03                           | .13  |
| <b>Change in insurance</b>                          | .95                             | .08  | .98                               | .14  | .97                              | .18  | 1.19                 | .19  | 1.17                           | .16  |
| <b>Private</b> (ref: public)                        | .60***                          | .07  | .43**                             | .12  | .19***                           | .03  | .46***               | .09  | .29***                         | .06  |
| <b>OOP on health (\$)</b>                           | 1.00                            | .00  | 1.00                              | .00  | 1.00                             | .00  | 1.00                 | .00  | 1.00                           | .00  |
| <b>Health Care Use</b>                              |                                 |      |                                   |      |                                  |      |                      |      |                                |      |
| Prescription drug events                            | 1.00                            | .00  | 1.00                              | .00  | .99                              | .01  | 1.00                 | .01  | 1.00                           | .01  |
| Office-based visits                                 | 1.00                            | .00  | 1.00                              | .01  | .98                              | .01  | 1.00                 | .01  | 1.01                           | .02  |
| Out-patient visits                                  | 1.00                            | .01  | .99                               | .02  | .98                              | .02  | 1.01                 | .02  | .93                            | .12  |
| Inpatient visits                                    | .81                             | .09  | .95                               | .15  | .69*                             | .1   | .74                  | .12  | .93                            | .12  |
| Emergency room visits                               | 1.17*                           | .08  | 1.10                              | .13  | 1.36**                           | .14  | 1.31*                | .14  | 1.19                           | .11  |
| <b>Post ACA</b>                                     | .91                             | .08  | .16***                            | .02  | .21***                           | .02  | .28***               | .03  | .17***                         | .02  |

SE = standard error. \*\*\* $p < .001$ , \*\* $p < .01$ , \* $p < .05$ , compared to persons with no problem. MI = mental illness. Transient MI = SPD or depression at one assessment; Persistent MI = SPD or depression at two assessments. FPL = Federal Poverty Line. Transient = Serious psychological distress (SPD) or depression at 1 assessment; Persistent = SPD or depression at both assessments. Poor self-rated health = fair or poor compared to good/very good/excellent. Functional limitations = problems with walking, climbing stairs, grasping objects, reaching overhead, lifting, bending or stooping, or standing for long periods of time. Activity limitation = dressing/bathing, eating, walking, toileting, hygiene. Chronic conditions include: diabetes mellitus, hypertension, coronary heart disease, myocardial infarction, cerebrovascular disease, asthma, emphysema, and arthritis. OOP = out-of-pocket expenditure on health care. OOP = out-of-pocket expenditure on health care. USC = usual source of care. Post ACA = assessed in 2010 or later.
